# Supplementary material
Source: PubMed Central journal article supplement (PMC8581832)

## Supplementary figure legend

### Figure S1 Apoptosis of cells treated without or with different concentrations of Megestrol were detected by flow cytometry

The human endometrial cancer Ishikawa and HHUA cells were treated without (Control) or with different concentrations of Megestrol (1, 10, 100 nM) or the vehicle DMSO for different time, respectively. Cell apoptosis were detected by flow cytometry.

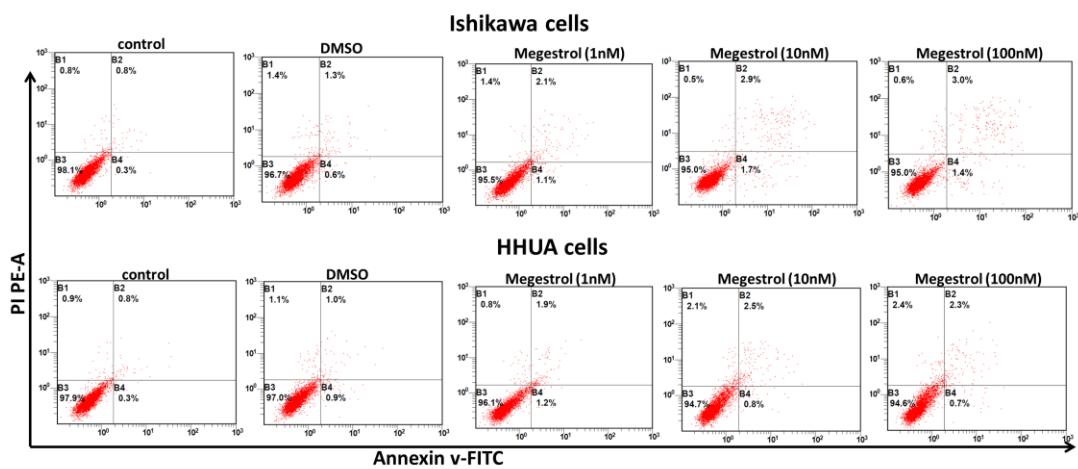

Supplement: sj-pdf-1-ebm-10.1177_15353702211026566.pdf [file sj-pdf-1-ebm-10.1177_15353702211026566.pdf]
